# Supplementary material for: A Novel Synthetic Strategy for Preparing Polyamide 6 (PA6)-Based Polymer with Transesterification
Source: MDPI journal article supplement (doi:10.3390/polym11060978), 2019-06-03

Supplementary Materials:

**Figure S1.** DSC thermographs of cooling (a) different molecular weight prePA6. DSC thermographs of heating (b) different molecular weight prePA6.

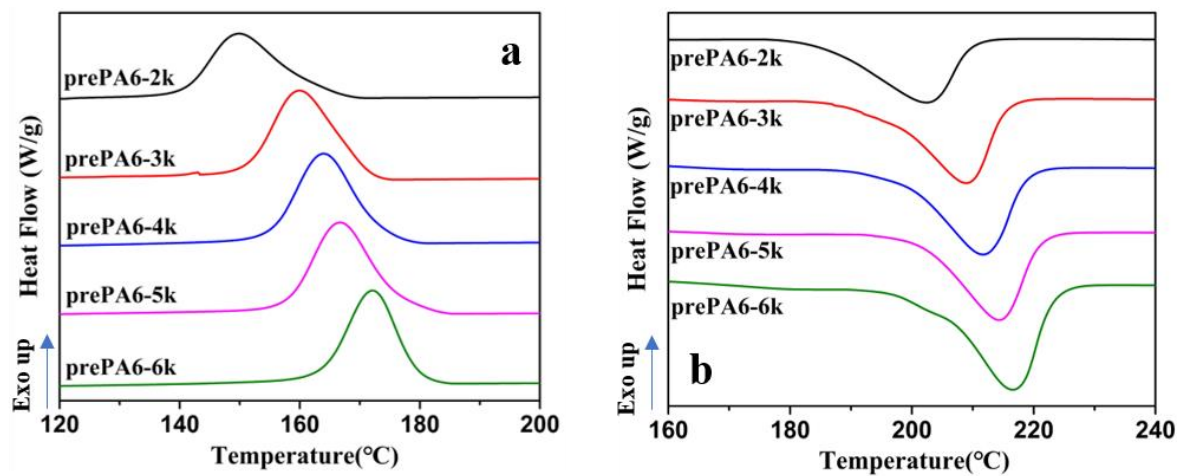

**Figure S2.** GPC of different samples.

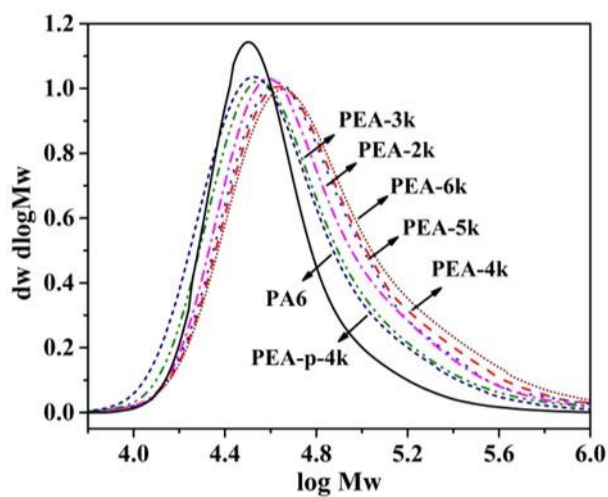

Supplement: s1 [file s1]
